# Supplementary material
Source: Springer Nature journal article supplement (https://www.springermedizin.de/resource/supplementary/12933_2012_484_MOESM6_ESM.pdf/9538634)

**A**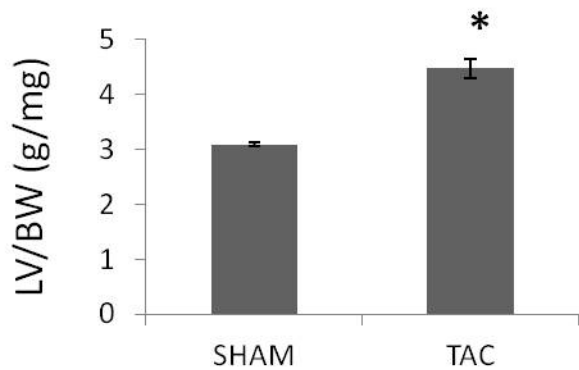**B**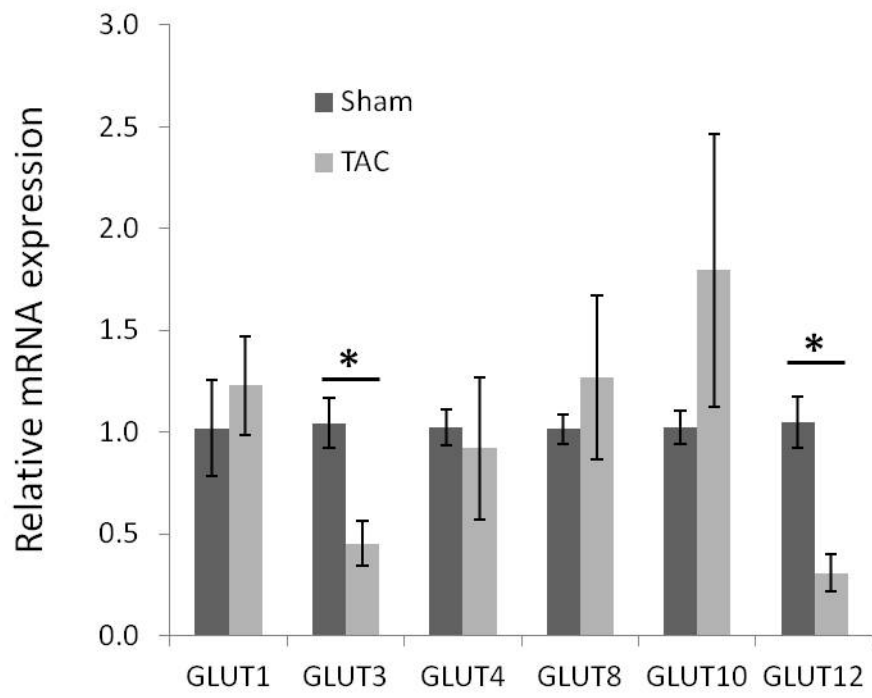

Supplement: MOESM6 [file 9538634]
